# Supplementary material for: Fluorine-functionalized 2D covalent organic frameworks withkgdtopology for efficient C2H2/CO2separation
Source: Royal Society of Chemistry journal article supplement (doi:10.1039/d3nj00045a), 2023-01-01
Supplement: d3nj00045a1.pdf [file d3nj00045a1.pdf]

*Supporting Information for*

**Fluorine-functionalized 2D Covalent Organic Frameworks with kgd Topology for Efficient C<sub>2</sub>H<sub>2</sub>/CO<sub>2</sub> Separation**

Jinxin Chen,<sup>a†</sup> Chuanhai Jiang,<sup>b†</sup> Zhihao Xing,<sup>a</sup> Jiahao Li,<sup>a</sup> Fangna Dai,<sup>b</sup> and Yongwu Peng<sup>\*a</sup>

<sup>a</sup>College of Materials Science and Engineering, Zhejiang University of Technology, Hangzhou, 310014, China

<sup>b</sup>School of Materials Science and Engineering, China University of Petroleum (East China), Qingdao 266580, China

E-mail: [ywpeng@zjut.edu.cn](mailto:ywpeng@zjut.edu.cn)

<sup>†</sup>J.X Chen and C. H. Jiang contributed equally to this work.

## Table of Content

|                                                                                  |     |
|----------------------------------------------------------------------------------|-----|
| 1. Materials and methods.....                                                    | S3  |
| 2. Synthesis and general procedures.....                                         | S5  |
| 2.1. Synthesis of monomers.....                                                  | S5  |
| 2.2. Synthesis and characterization of COFs.....                                 | S9  |
| <b>Figures S1-2.</b> FT-TR spectra.....                                          | S10 |
| <b>Figure S3.</b> TGA curves.....                                                | S11 |
| <b>Figures S4-5.</b> SEM images.....                                             | S12 |
| <b>Figures S6-7.</b> TEM images.....                                             | S13 |
| <b>Figure S8.</b> The coverage-dependent adsorption enthalpies ( $Q_{st}$ )..... | S14 |
| 2.3. Unit cell parameters and fractional atomic coordinates.....                 | S15 |
| <b>Tables S1-2.</b> Unit cell parameters and fractional atomic coordinates.....  | S15 |
| 3. References.....                                                               | S19 |

## 1. Materials and methods

All the chemicals are commercially available, and used without further purification. All solvents were dried and distilled according to conventional methods.

**Power X-ray diffraction (PXRD):** PXRD patterns were collected on an X-ray diffraction (XRD) system (DX-27mini, China) using Cu K $\alpha$  radiation.

**Fourier transform infrared (FT-IR):** IR spectrum was measured on an IR spectrometer (Nicolet 6700) between the ranges of 4000 to 400 cm<sup>-1</sup>.

**Solution nuclear magnetic resonance (NMR):** Liquid state <sup>1</sup>H nuclear magnetic resonance spectroscopy was collected on a Varian Mercury Plus 400 NMR Spectrometer. Liquid State <sup>13</sup>C nuclear magnetic resonance spectroscopy was collected on a Bruker AscendTM 400 MHz NMR Spectrometer.

**High resolution mass spectrometry (HRMS):** The electrospray ionization mass spectrometry (ESI-MS) spectra were recorded using an Sciex X500R QTOF MS spectrometer.

**Solid-state nuclear magnetic resonance (ssNMR):** Solid-state nuclear magnetic resonance (NMR) data were performed on a Bruker AVANCE III 600 spectrometer with cross-polarization magic-angle-spinning (CP/MAS) at a resonance frequency of 150.9 MHz. <sup>13</sup>C CP/MAS NMR spectra were recorded using a 4 mm MAS probe and a spinning rate of 12kHz. A contact time of 4 ms and a recycle delay of 2 s were used for the <sup>13</sup>C CP/MAS NMR measurement. The chemical shifts of <sup>13</sup>C were externally referenced to tetramethylsilane (TMS).

**Scanning electron microscope (SEM):** SEM images were collected using a GeminiSEM 500 system.

**Transmission electron microscope (TEM):** TEM images were obtained with a Tecnai G2 F30 S-Twin. Low-dose HRTEM imaging was conducted on an objective lens aberration-corrected electron microscope under 300 kV, which is equipped with a direct electron detection camera. The low-dose HRTEM image acquisition was conducted under a dose rate less than 1e  $\text{\AA}^{-2} \text{s}^{-1}$  and a dose fractionation mode with ultrafast exposure. The image stack was aligned, projected and corrected before used for interpreting the chemical information.

**Thermogravimetric analysis (TGA):** TGA was performed using a TA Q5000 under flowing N<sub>2</sub> with 15 K min<sup>-1</sup> ramp rate. Samples were heated in a Platinum pan (800 °C, 15 °C min<sup>-1</sup>) under a N<sub>2</sub> flux (25 mL min<sup>-1</sup>).

**Sorption isotherm for N<sub>2</sub>:** Micrometrics ASAP2020 system were used to measure the specific surface area and pore structure using nitrogen as the adsorbate at 77 K, after outgassing the samples overnight at 120 °C.

**Gas sorption:** The samples were activated under vacuum for 12 hours at 120 °C. Gas adsorption experiments at 298 K were performed by using JW-BK200 surface area analyzer. A circulation constant temperature water bath was used to stabilize the temperature at 273/298 K during the test.

**Crystal structure modeling:** Structural modeling of COFs was generated using the Materials Studio<sup>S1</sup> program employing the *Building (Crystal)* module, the lattice model was geometrically optimized using force-field based method (*Forcite* molecular dynamics module) and SCC-DFTB (*DFTB +* module). The Pawley fitting (*Reflex* module) was performed to optimize the lattice parameters iteratively until the Rwp value converges and the overlay of the observed with refined profiles shows good agreement. Powder indexing and Rietveld refinement were performed using EXPO2014<sup>S2</sup> various topology structures were illustrated by VESTA software<sup>S3</sup>.

## 2. Synthesis and general procedures

### 2.1 Synthesis of monomers

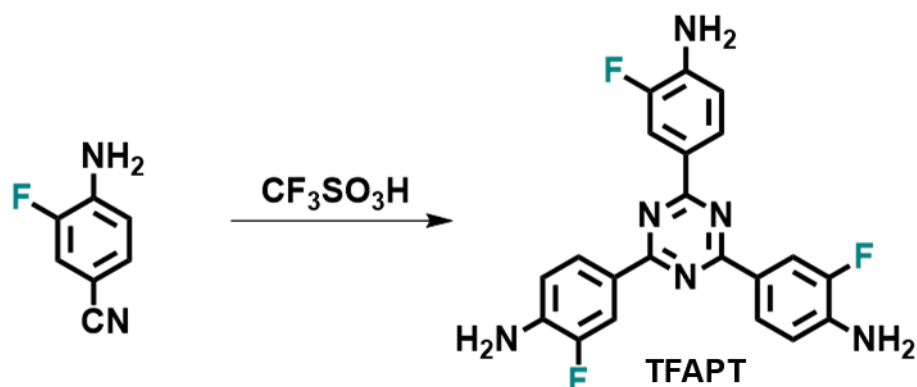

TFAPT was synthesized via superacid catalyzed trimerization of 3-fluoro-4-aminobenzonitrile. In a typical synthesis, 3-fluoro-4-aminobenzonitrile (500 mg, 3.8 mmol) was added in a round bottom flask at 0 °C. Then 2 mL trifluoromethanesulfonic acid (TFA) was added dropwise for 10 min and the resultant mixture was stirred for 24 h at room temperature in inert atmosphere. After that, 20 mL distilled water was added to the mixture and it was neutralized by adding 2 M NaOH solution until the pH reaches to 7. The resultant yellow product was filtered and washed several times with methanol and distilled water. The purified product (0.2 g) was characterized by  $^1\text{H}$  NMR,  $^{13}\text{C}$  NMR and MS.  $^1\text{H}$  NMR (500 MHz,  $\text{DMSO}-d_6$ )  $\delta$ : 8.25 (t, 6H), 7.63 (t, 3H), 6.07 (s, 6H).  $^{13}\text{C}$  NMR (101 MHz,  $\text{DMSO}-d_6$ )  $\delta$ : 170.16, 149.05, 141.22, 126.47, 123.10, 115.70. MS:  $m/z$  409.1 (Calcd  $m/z$  409.1 for  $[\text{M}]^+$ ).

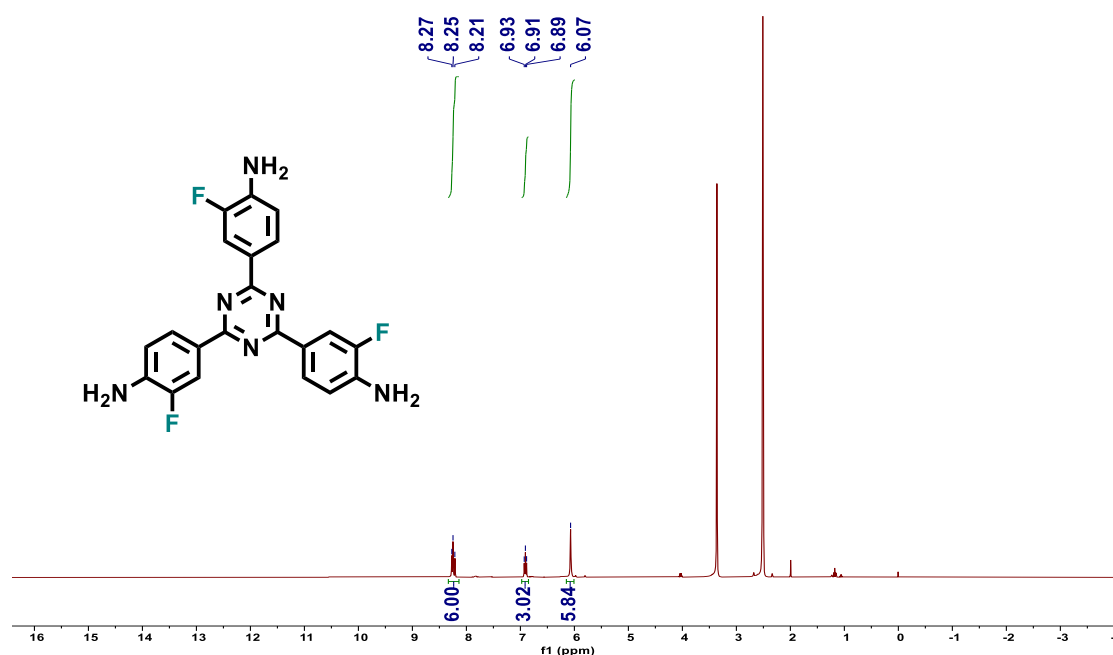

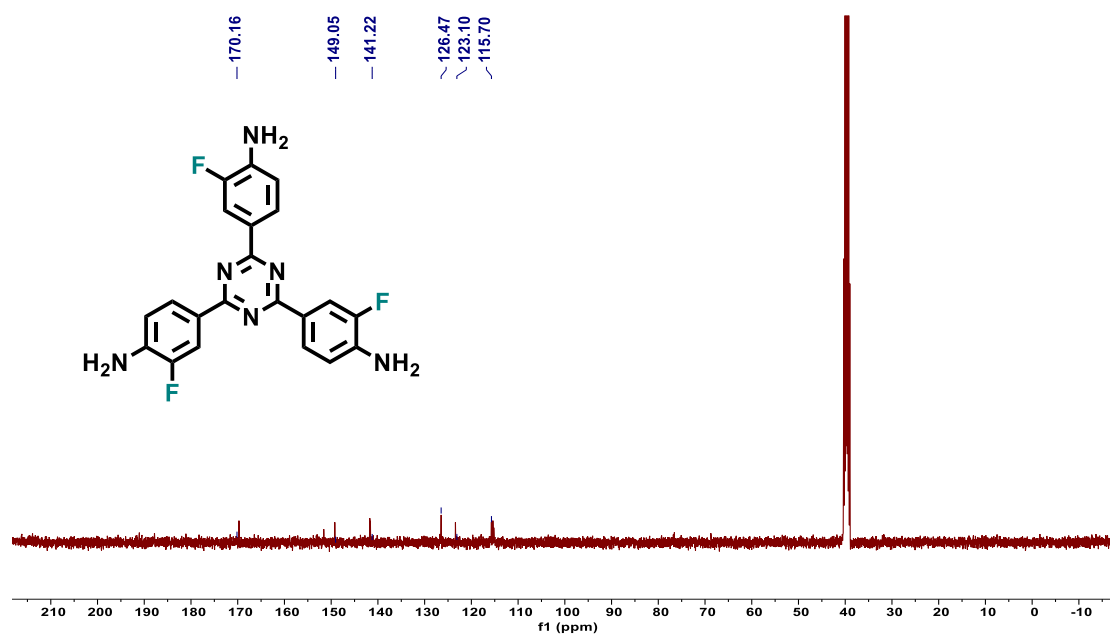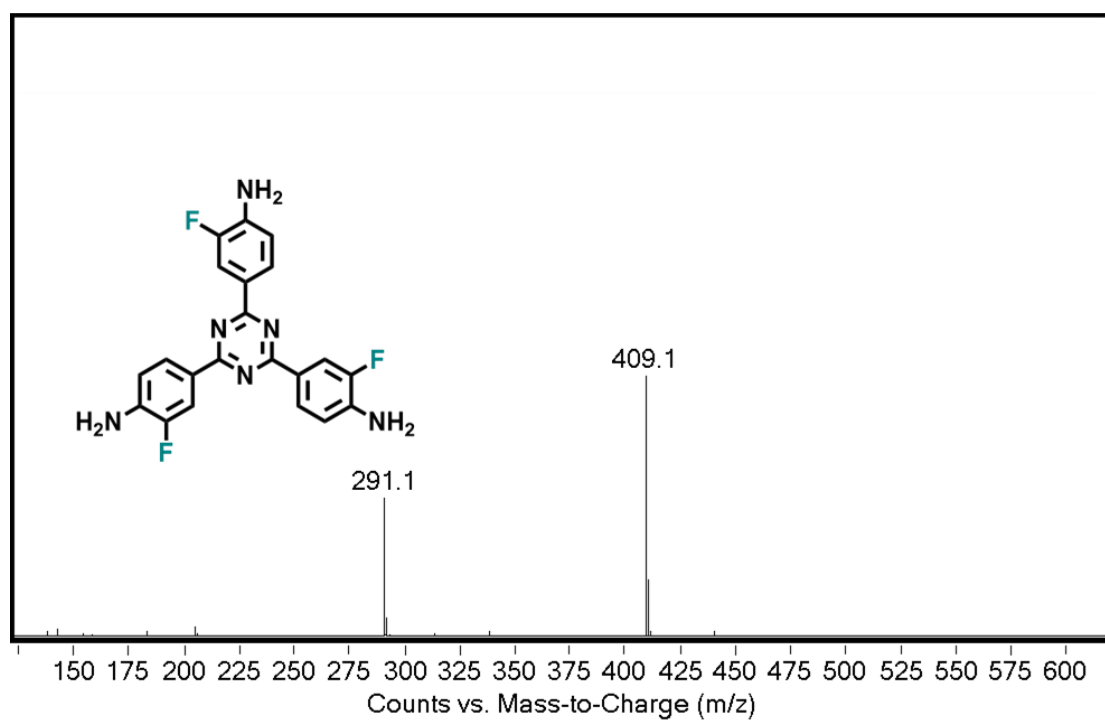

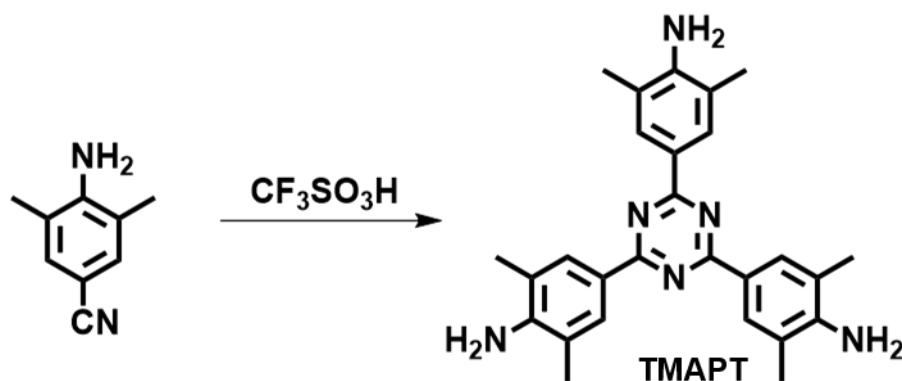

TMAPT was synthesized following the same protocol of TFAPT with minor modifications. Typically, 4-amino-3,5-dimethyl-benzonitrile (500 mg, 3.5 mmol) and 2 mL chloroform (CHCl<sub>3</sub>) were added in a round bottom flask at 0 °C. Then 1 mL trifluoromethanesulfonic acid (TFA) was added dropwise for 20 min and the resultant mixture was stirred for 24 h at room temperature in inert atmosphere. After that, 20 mL distilled water was added to the mixture and it was neutralized by adding 2 M NaOH solution until the pH reaches to 7. The resultant yellow product was filtered and washed several times with methanol and distilled water. The purified product (0.15 g) was characterized by <sup>1</sup>H NMR, <sup>13</sup>C NMR and MS. <sup>1</sup>H NMR (500 MHz, DMSO-*d*<sub>6</sub>) δ: 8.18 (s, 6H), 5.41 (s, 6H), 2.24 (s, 18H). <sup>13</sup>C NMR (101 MHz, DMSO-*d*<sub>6</sub>) δ: 170.20, 149.32, 129.15, 123.38, 120.45, 18.15. MS: m/z 438 (Calcd m/z 439.8 for [M]<sup>+</sup>).

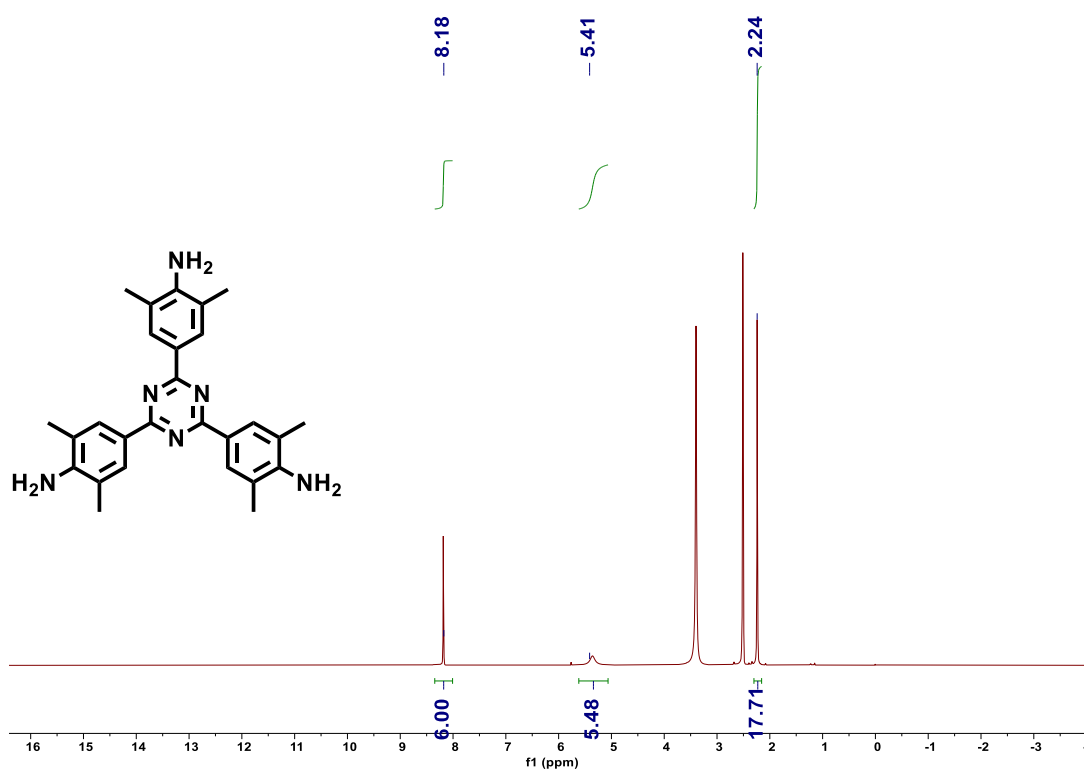

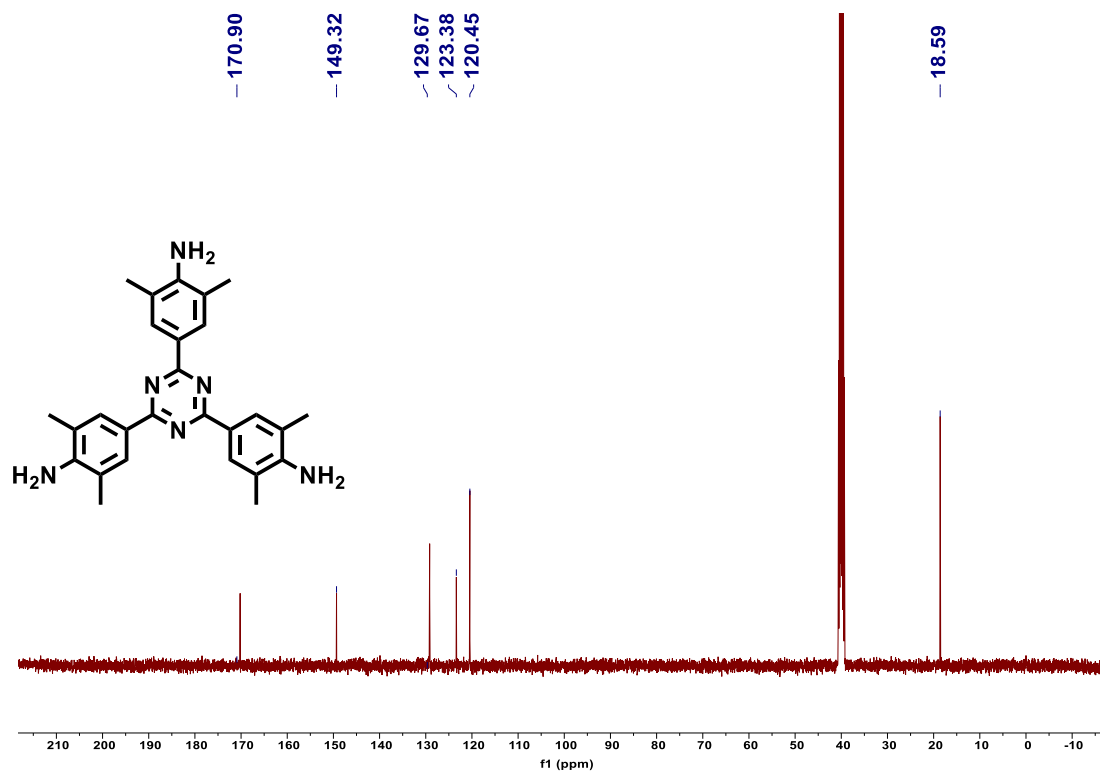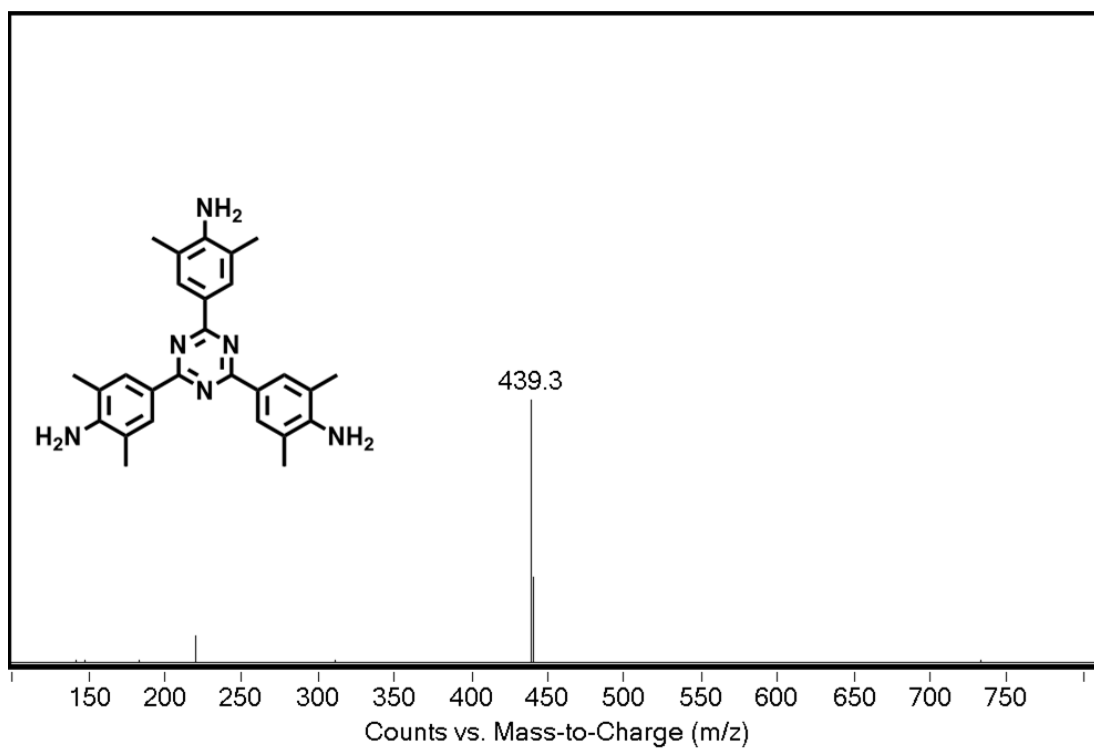



## 2.2 Synthesis and characterization of COFs

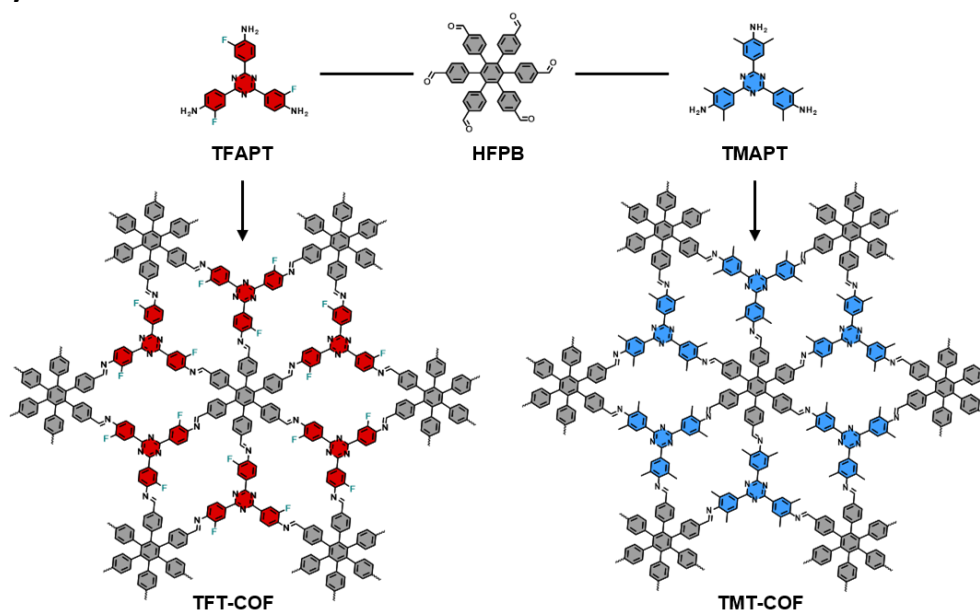

**Tft-COF:** A 10 mL Pyrex tube was charged with Hexa(4-formylphenyl)benzene (HFPB) (21 mg, 0.03 mmol), Tris(4-aminophenyl-3-fluoro)triazine (24.48 mg, 0.06 mmol) and N, N-Dimethylacetamide/*n*-butanol (v/v=1:2, 1.2 mL). After the mixture was sonicated for 5 min, a clear solution was obtained. Subsequently, 0.6 mL of Trifluoroacetic acid were added. Afterwards, the tube was flash frozen at 77 K using a liquid N<sub>2</sub> bath and degassed by three freeze-pump-thaw cycles, sealed under vacuum and then heated at 120 °C for 3 days. A yellow precipitate was formed, which was collected by centrifugation and washed with anhydrous ethanol, anhydrous acetone, and anhydrous tetrahydrofuran, separately. The collected sample was then solvent-exchanged with anhydrous tetrahydrofuran for 2-3 times and dried at 120 °C under vacuum for 12 h to give a yellow powder (30 mg, 66% isolated yield).

**Tmt-COF:** A 10 mL Pyrex tube was charged with hexa(4-formylphenyl)benzene (HFPB) (21 mg, 0.03 mmol), Tris(4-aminophenyl-3,5-Dimethyl)triazine (26.34 mg, 0.06 mmol) and N, N-Dimethylacetamide/*n*-butanol (v/v=1:2, 1.2 mL). After the mixture was sonicated for 5 min, a clear solution was obtained. Subsequently, 0.6 mL of Trifluoroacetic acid was added. Afterward, the tube was flash-frozen at 77 K using a liquid N<sub>2</sub> bath and degassed by three freeze-pump-thaw cycles, sealed under vacuum, and then heated at 120 °C for 3 days. A yellow precipitate was formed, which was collected by centrifugation and washed with anhydrous ethanol, anhydrous acetone, and anhydrous tetrahydrofuran, separately. The collected sample was then solvent-exchanged with anhydrous tetrahydrofuran for 2-3 times and dried at 120 °C under vacuum for 12 h to give a yellow powder (40 mg, 84% isolated yield).

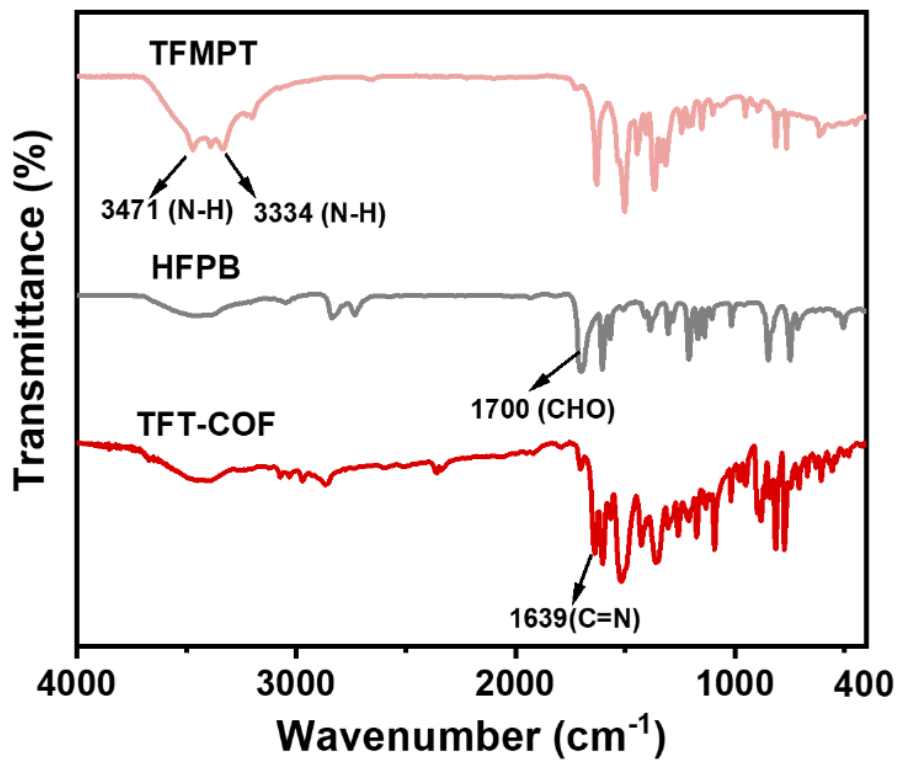

Figure S1. FT-IR spectra of TAFPT, HFPB, and TFT-COF.

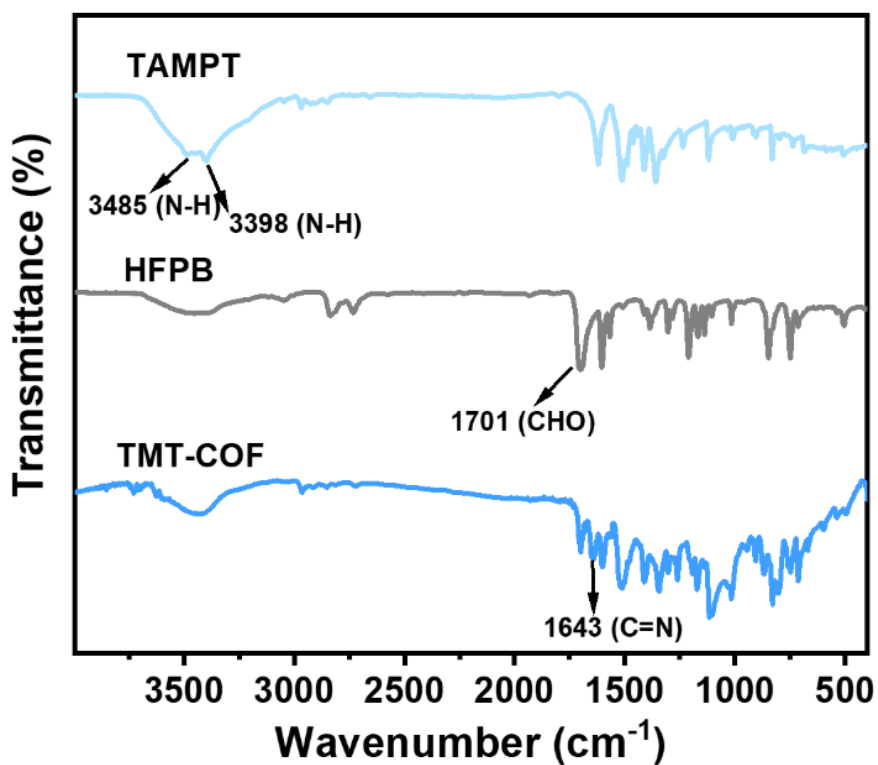

Figure S2. FT-IR spectra of TAMPT, HFPB, and TMT-COF

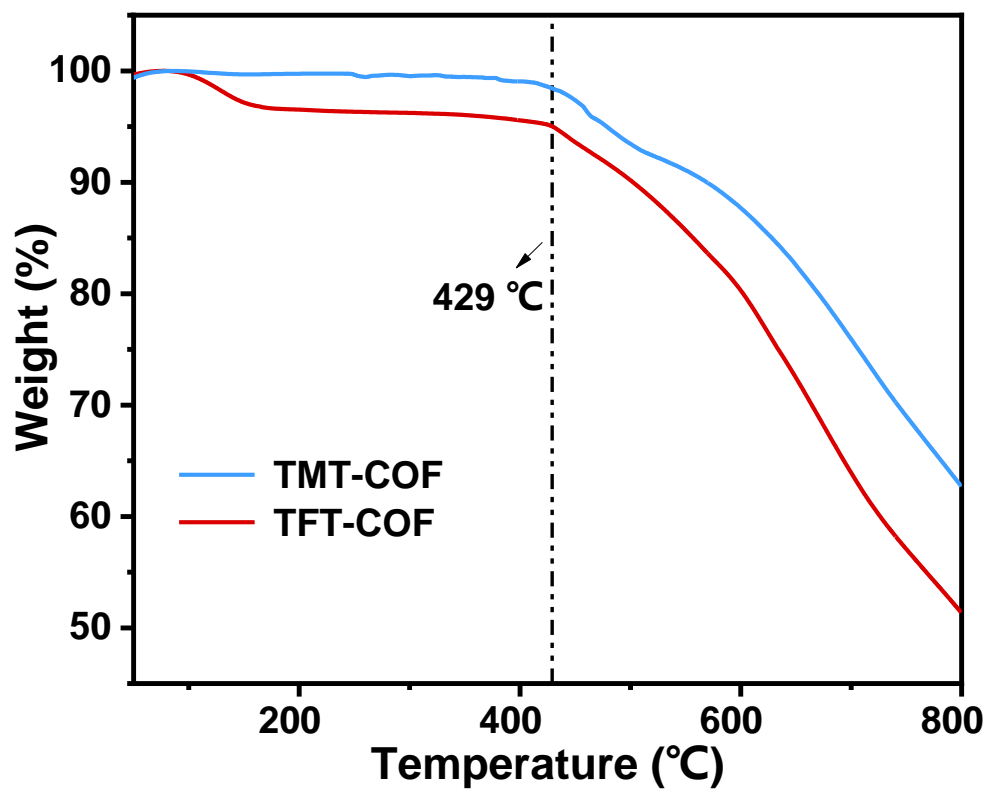

Figure S3. TGA curves of TFT-COF and TMT-COF.

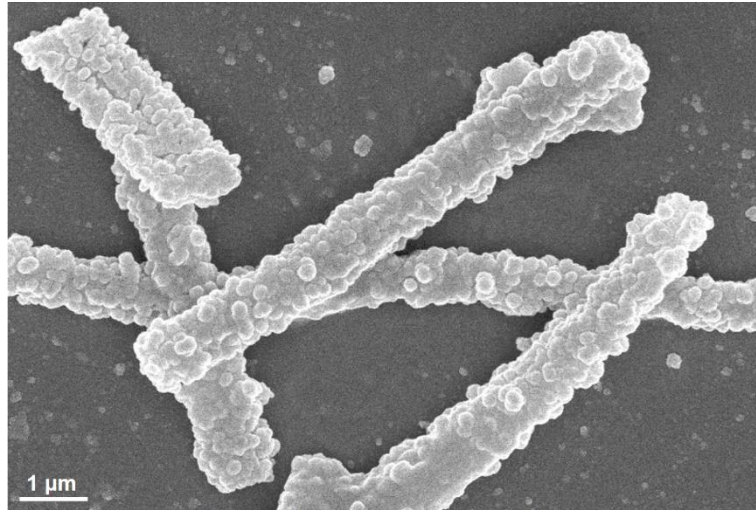

**Figure S4.** SEM image of TFT-COF.

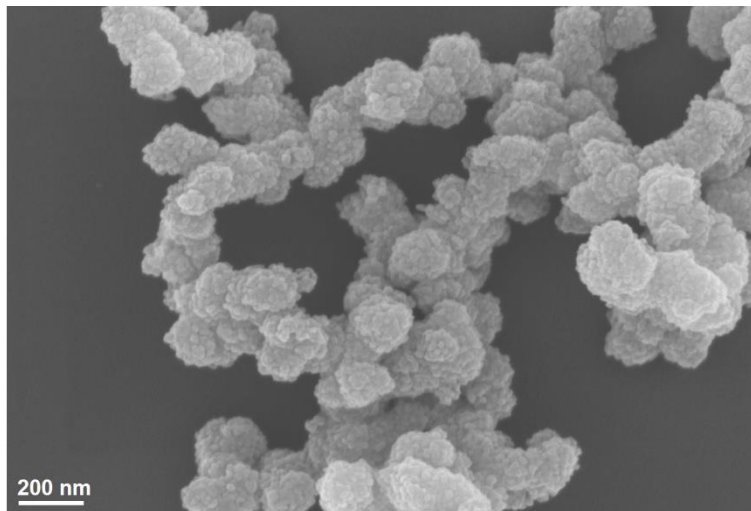

**Figure S5.** SEM image of TMT-COF.

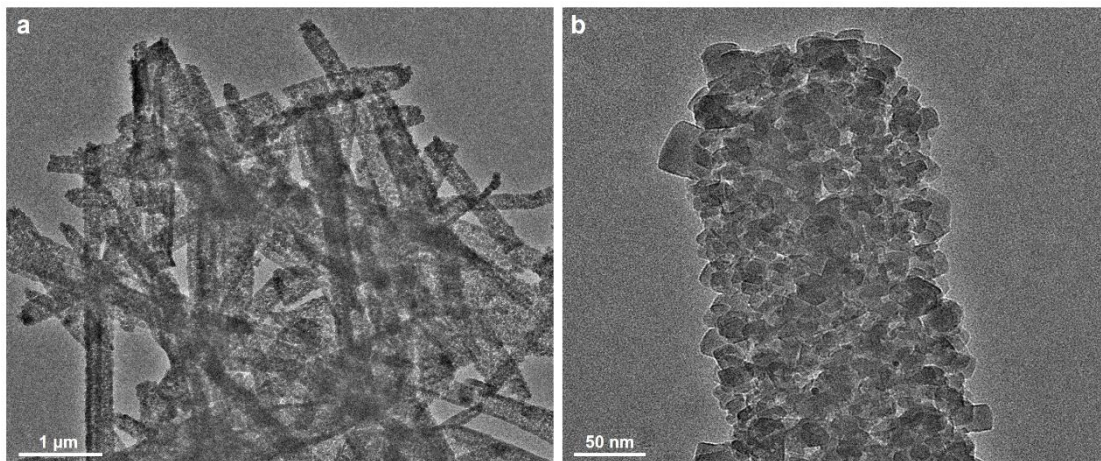

**Figure S6.** TEM images of TFT-COF.

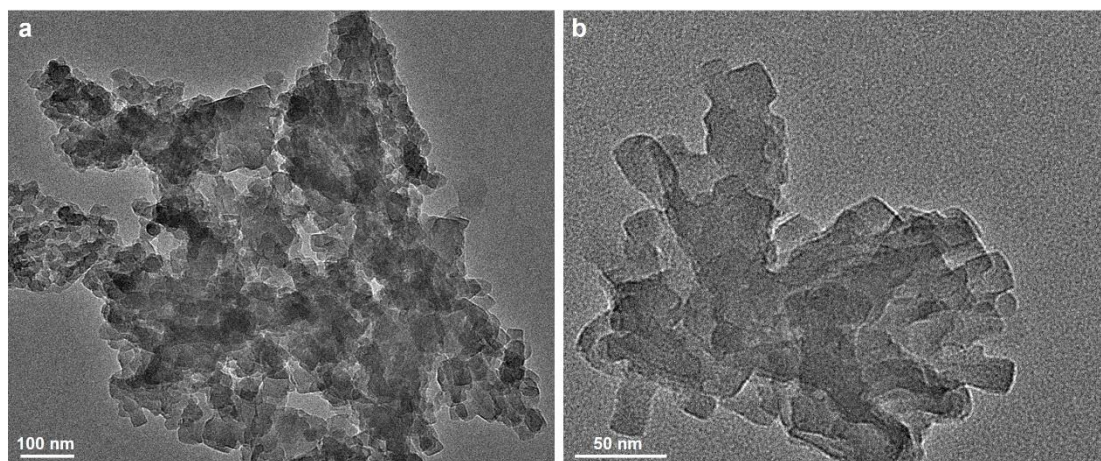

**Figure S7.** TEM images of TMT-COF.

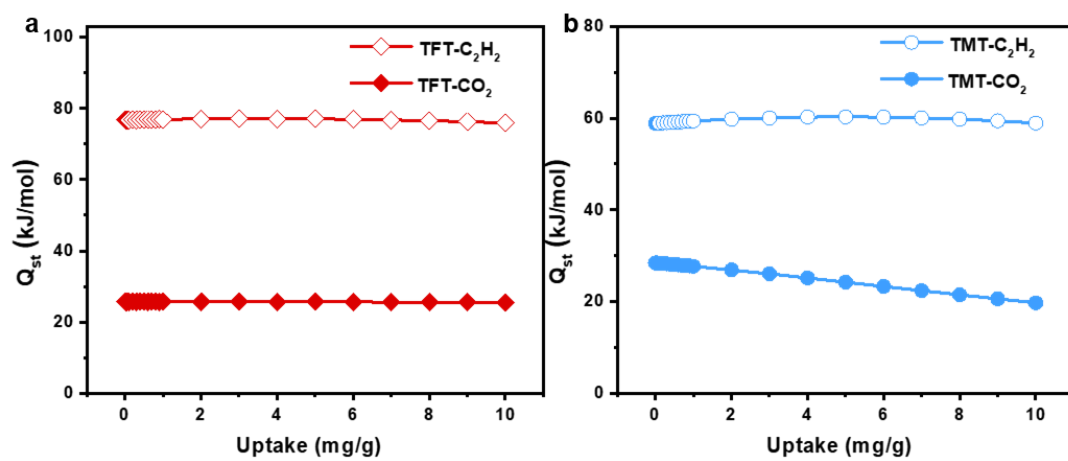

**Figure S8.** The coverage-dependent adsorption enthalpies ( $Q_{st}$ ) of  $C_2H_2$  and  $CO_2$  for (a) TFT-COF, and (b) TMT-COF.

### 2.3 Unit cell parameters and fractional atomic coordinates

**Table S1.** Unit cell parameters and fractional atomic coordinates for **TFT-COF** calculated based on ABC stacking.

| Space group          | <i>R</i> 3                                                                    |         |          |
|----------------------|-------------------------------------------------------------------------------|---------|----------|
| Calculated unit cell | $a = 26.0484\text{\AA}, b = 26.0484\text{\AA},$<br>$c = 11.7319\text{\AA}$    |         |          |
|                      | $\alpha = 90.0000^\circ, \beta = 90.0000^\circ,$<br>$\gamma = 120.0000^\circ$ |         |          |
| Atoms                | X                                                                             | Y       | Z        |
| C1                   | 0.03117                                                                       | 0.06274 | 0.00006  |
| C2                   | 0.0645                                                                        | 0.12812 | 0.0179   |
| C3                   | 0.06217                                                                       | 0.1672  | -0.06127 |
| C4                   | 0.09394                                                                       | 0.22839 | -0.0423  |
| C5                   | 0.12929                                                                       | 0.25136 | 0.05577  |
| C6                   | 0.13183                                                                       | 0.21222 | 0.1345   |
| C7                   | 0.09943                                                                       | 0.1512  | 0.11595  |
| C8                   | 0.83227                                                                       | 0.14822 | -0.07517 |
| N1                   | 0.15701                                                                       | 0.35309 | 0.01705  |
| C9                   | 0.19313                                                                       | 0.41623 | 0.02754  |
| C10                  | 0.16615                                                                       | 0.45105 | 0.02187  |
| C11                  | 0.20038                                                                       | 0.51287 | 0.02578  |
| C12                  | 0.26256                                                                       | 0.54096 | 0.03223  |
| C13                  | 0.28943                                                                       | 0.5058  | 0.03894  |
| C14                  | 0.25527                                                                       | 0.44409 | 0.03597  |
| C15                  | 0.29938                                                                       | 0.60641 | 0.0293   |
| N2                   | 0.35946                                                                       | 0.633   | 0.02924  |
| C16                  | 0.96879                                                                       | 0.93724 | -0.00318 |
| C17                  | 0.93709                                                                       | 0.87177 | -0.02026 |
| C18                  | 0.89547                                                                       | 0.83279 | 0.05881  |
| C19                  | 0.86636                                                                       | 0.77154 | 0.04051  |
| C20                  | 0.87952                                                                       | 0.74841 | -0.05632 |
| C21                  | 0.92154                                                                       | 0.78741 | -0.13471 |
| C22                  | 0.94959                                                                       | 0.84848 | -0.11728 |
| C23                  | 0.15035                                                                       | 0.83467 | 0.07593  |
| N3                   | 0.80315                                                                       | 0.64696 | -0.02311 |
| C24                  | 0.77585                                                                       | 0.58372 | -0.0324  |
| C25                  | 0.81009                                                                       | 0.556   | -0.04267 |
| C26                  | 0.78295                                                                       | 0.49434 | -0.04381 |

|     |         |         |          |
|-----|---------|---------|----------|
| C27 | 0.72105 | 0.45899 | -0.03448 |
| C28 | 0.68676 | 0.48686 | -0.027   |
| C29 | 0.71408 | 0.54872 | -0.02417 |
| C30 | 0.69271 | 0.39357 | -0.03068 |
| N4  | 0.63276 | 0.3592  | -0.03063 |



**Table S2.** Unit cell parameters and fractional atomic coordinates for **TMT-COF** calculated based on ABC stacking.

| Space group          |         | <i>R</i> 3                                                                                                                                                        |          |
|----------------------|---------|-------------------------------------------------------------------------------------------------------------------------------------------------------------------|----------|
| Calculated unit cell |         | $a = 26.0091 \text{ \AA}, b = 26.0091 \text{ \AA},$<br>$c = 11.7562 \text{ \AA}$<br>$\alpha = 90.0000^\circ, \beta = 90.0000^\circ,$<br>$\gamma = 120.0000^\circ$ |          |
| Atoms                | X       | Y                                                                                                                                                                 | Z        |
| C1                   | 0.03184 | 0.06273                                                                                                                                                           | -0.00071 |
| C2                   | 0.06544 | 0.12803                                                                                                                                                           | 0.01705  |
| C3                   | 0.06453 | 0.16707                                                                                                                                                           | -0.06381 |
| C4                   | 0.09365 | 0.22806                                                                                                                                                           | -0.04253 |
| C5                   | 0.12428 | 0.25083                                                                                                                                                           | 0.06042  |
| C6                   | 0.12558 | 0.2117                                                                                                                                                            | 0.14083  |
| C7                   | 0.09659 | 0.15085                                                                                                                                                           | 0.11896  |
| C8                   | 0.84584 | 0.16121                                                                                                                                                           | -0.08567 |
| N9                   | 0.15917 | 0.35278                                                                                                                                                           | 0.00904  |
| C10                  | 0.19396 | 0.41584                                                                                                                                                           | 0.02408  |
| C11                  | 0.16633 | 0.45069                                                                                                                                                           | 0.0172   |
| C12                  | 0.20088 | 0.51266                                                                                                                                                           | 0.02422  |
| C13                  | 0.26291 | 0.5408                                                                                                                                                            | 0.03326  |
| C14                  | 0.29006 | 0.50598                                                                                                                                                           | 0.04048  |
| C15                  | 0.25649 | 0.44397                                                                                                                                                           | 0.0349   |
| C16                  | 0.29955 | 0.60633                                                                                                                                                           | 0.03072  |
| N17                  | 0.35971 | 0.63317                                                                                                                                                           | 0.03063  |
| C23                  | 0.10053 | 0.42367                                                                                                                                                           | -0.00169 |
| C26                  | 0.28844 | 0.409                                                                                                                                                             | 0.03302  |
| C27                  | 0.96819 | 0.93726                                                                                                                                                           | -0.00357 |
| C28                  | 0.93554 | 0.8719                                                                                                                                                            | -0.02101 |
| C29                  | 0.8952  | 0.83332                                                                                                                                                           | 0.05992  |
| C30                  | 0.86294 | 0.77224                                                                                                                                                           | 0.03942  |
| C31                  | 0.8708  | 0.74894                                                                                                                                                           | -0.06285 |
| C32                  | 0.91143 | 0.78765                                                                                                                                                           | -0.14353 |
| C33                  | 0.94364 | 0.84855                                                                                                                                                           | -0.12242 |
| C34                  | 0.15871 | 0.8437                                                                                                                                                            | 0.0844   |
| N35                  | 0.80368 | 0.6471                                                                                                                                                            | -0.01022 |
| C36                  | 0.77622 | 0.58401                                                                                                                                                           | -0.02436 |
| C37                  | 0.81114 | 0.55639                                                                                                                                                           | -0.03286 |
| C38                  | 0.78317 | 0.49445                                                                                                                                                           | -0.03986 |

|     |         |         |          |
|-----|---------|---------|----------|
| C39 | 0.72113 | 0.4592  | -0.03604 |
| C40 | 0.68672 | 0.48695 | -0.02917 |
| C41 | 0.71381 | 0.54894 | -0.02089 |
| C42 | 0.69273 | 0.39365 | -0.03424 |
| N43 | 0.63271 | 0.35921 | -0.03413 |
| C49 | 0.87798 | 0.59183 | -0.02724 |
| C52 | 0.67611 | 0.57736 | -0.00499 |

### 3. References

- (S1) Materials Studio; Accelrys: San Diego.
- (S2) <http://www.ba.ic.cnr.it/softwareic/expo/>
- (S3) <http://www.jp-minerals.org/vesta/en/>
